# Supplementary material for: Links between evidence-based medicine and shared decision-making in courses for doctors in training: a scoping review
Source: HighWire-hosted journal article supplement (doi:10.1136/bmjopen-2021-057335), 2022-04-01
Supplement: bmjopen-2021-057335supp002_data_supplement.pdf [file bmjopen-2021-057335supp002_data_supplement.pdf]

Supplemental Table 1 EBM Courses

| First Author | Year | Country | Cohort                         | Design       | Setting & Duration                                       | Content & delivery                                                                                                                                          | Outcome measures                                                                                                                                                          | Outcomes                                                                                                                                                                                                                                                                                      | Outcomes: NWKM*              | Patient outcomes/involvement                       |
|--------------|------|---------|--------------------------------|--------------|----------------------------------------------------------|-------------------------------------------------------------------------------------------------------------------------------------------------------------|---------------------------------------------------------------------------------------------------------------------------------------------------------------------------|-----------------------------------------------------------------------------------------------------------------------------------------------------------------------------------------------------------------------------------------------------------------------------------------------|------------------------------|----------------------------------------------------|
| Aneese       | 2019 | USA     | 60 internal medicine residents | Before-after | Classroom and clinically integrated. Duration: one year. | Modular programme. (1) monthly EBM workshop, (2) monthly journal club, (3) resident lead morning report (4) teaching rounds. Emphasis on critical appraisal | Satisfaction (via focus group), short term Knowledge and skills (modified Berlin test), long term application to clinical practice (Fresno test at start and end of year) | Statistically significant improvement reported in short term knowledge, skills: therapy workshops (N=25) median pre-test score of 8 (IQR: [6–9]) vs post-test 8 (IQR: [8–9]), (p=0.006); diagnosis (N=16) pre-test score of 6 (IQR: [3–6]) vs post-test 7 (IQR: [6–9]), (p=0.006); systematic | Level 2: Change in knowledge | Authors assumed an improvement in patient outcomes |
| Bastaninejad | 2019 | Iran    | 41 otolaryngology residents    | Before-after | Workshop in 2 hospitals. Duration: 6 hours.              | An EBM workshop in each hospital. Content practised in journal club.                                                                                        | Modified Fresno test 6 months later                                                                                                                                       | The mean score of the modified Fresno test was 57.43 ± 22.07 before the workshop and 79.26 ± 22.48 after the workshop (P < 0.001).                                                                                                                                                            | Level 2                      | Not indicated                                      |
| Bentley      | 2018 | USA     | 53 emergency residents         | Before-after | Classroom. Duration: one year                            | 8 Modules - learning reinforced with journal club. Content based on JAMA Users' Guides                                                                      | Berlin Questionnaire before and after curriculum. Self-rating task.                                                                                                       | Median test pre scores 40%, median post scores 73.3% (p=0.002)                                                                                                                                                                                                                                | Level 2                      | Not indicated                                      |

## Supplemental Table 1 EBM Courses

| First Author | Year | Country       | Cohort                                       | Design                               | Setting & Duration                                                                               | Content & delivery                                                                                                                                                                                                              | Outcome measures                                                                                                                                                                                                                                                       | Outcomes                                                                                                                                                                                                                                                                                                               | Outcomes: NWKM*                                                                             | Patient outcomes/involvement |
|--------------|------|---------------|----------------------------------------------|--------------------------------------|--------------------------------------------------------------------------------------------------|---------------------------------------------------------------------------------------------------------------------------------------------------------------------------------------------------------------------------------|------------------------------------------------------------------------------------------------------------------------------------------------------------------------------------------------------------------------------------------------------------------------|------------------------------------------------------------------------------------------------------------------------------------------------------------------------------------------------------------------------------------------------------------------------------------------------------------------------|---------------------------------------------------------------------------------------------|------------------------------|
| Cartledge    | 2017 | UK and Rwanda | 31 residents                                 | Before-after                         | Online module via Facebook. Duration: 5 weeks.                                                   | Distance learning module created using social media.                                                                                                                                                                            | Columbia EBM Instrument, was used to measure outcome measures such as "comfort-level", "self-reported practice", and "knowledge" before and after the module.                                                                                                          | 12 residents (40%) engaged with the module. Knowledge of EBM did increase but was not attributed to the Facebook® group. Comfort of practising EBM and self-reported practice score increased slightly in those who completed course                                                                                   | Level 1: learners' reaction. Positive feedback of learning experience by those who engaged. | Not indicated                |
| Goodarzi     | 2021 | Iran          | 39 (active group) and 30 (Passive) residents | Before-After comparison of 2 cohorts | Integrated (passive) learning for one year vs active learning (lectures) for 12 hours (6 weeks). | Two educational programs for residents. Active group: Weekly 2 hours EBP presentations with participation, covering all EBP steps. Passive group: EBM course for one year integrated into rounds, journal club, morning report. | Primary outcome: knowledge, attitudes, and behaviour, using EBP knowledge, attitude, behaviour questionnaire (EBP-KABQ) tool. Also, before-after ACE EBP competency test. Active group took questionnaires before and one month after intervention. Passive group took | Before the educational intervention, both groups had similar EBP-KABQ & ACE tool scores. ACE results: (4.14 ± 1.72 in the active group vs. 4.79 ± 0.94 in the passive group, p>0.05). Post-intervention scores showed a significant difference between groups (8.86 ± 2.62 vs. 7.31 ± 2.92, p=0.029, in the active and | Level 2                                                                                     | Not indicated                |

Supplemental Table 1 EBM Courses

| First Author | Year | Country | Cohort                      | Design                                               | Setting & Duration                                                                     | Content & delivery                                                                                                                                | Outcome measures                                                                                                                                                             | Outcomes                                                                                                                                                                                                     | Outcomes: NWKM*                          | Patient outcomes/involvement                                                                                    |
|--------------|------|---------|-----------------------------|------------------------------------------------------|----------------------------------------------------------------------------------------|---------------------------------------------------------------------------------------------------------------------------------------------------|------------------------------------------------------------------------------------------------------------------------------------------------------------------------------|--------------------------------------------------------------------------------------------------------------------------------------------------------------------------------------------------------------|------------------------------------------|-----------------------------------------------------------------------------------------------------------------|
| Korownyk     | 2020 | Canada  | Family medicine residents   | retrospective review over 15 years of interventions. | Blended learning: workshop, lectures, integrated clinical settings. Duration: 2 years. | Multi-modal course. 2-day workshop, quarterly 1-hour didactic lectures, monthly journal clubs, a computerised EBP desktop and one-page summaries. | questionnaires before and one year after<br>Modified rating scales to determine attitudes and comfort . Knowledge tests dropped previously as knowledge is known to increase | passive group, respectively). Significant increase in ACE tool scores in both groups (p<0.000, in both groups).Active course produced higher scores in knowledge, attitude, decision,outcome, and behaviour. | Level 3: Self-reported behaviour changes | Authors stated their increased recognition of importance of shared decision making as a patient outcome in EBM. |
| Mlika        | 2019 | Tunisia | 20 family medicine trainees | Before-after                                         | One-day workshop                                                                       | Workshop consisted of didactic morning lecture and afternoon teamwork with focus on critical appraisal                                            | Pre- and post-knowledge test and feedback form                                                                                                                               | Non-significant difference, p=0.2. 10/17 participants improved their scores. 5/17 participants had the same scores and 2/17 participant                                                                      | Level 1                                  | Not indicated                                                                                                   |

Supplemental Table 1 EBM Courses

| First Author | Year | Country | Cohort                  | Design       | Setting & Duration                                               | Content & delivery                                                                                                                                                                | Outcome measures                                                      | Outcomes                                                                                                                     | Outcomes: NWKM* | Patient outcomes/involvement                                                 |
|--------------|------|---------|-------------------------|--------------|------------------------------------------------------------------|-----------------------------------------------------------------------------------------------------------------------------------------------------------------------------------|-----------------------------------------------------------------------|------------------------------------------------------------------------------------------------------------------------------|-----------------|------------------------------------------------------------------------------|
| Mousavi      | 2019 | Iran    | 86 First year residents | Before-after | Classroom: 12 sessions of EBM based on Team-Based Learning (TBL) | Phase 1; Individual preparation; Individual Readiness Assurance Tests (IRATs) and Phase 2: Group Readiness Assurance Tests (GRATs); Phase 3: integration with real world scenario | Individual and team scores combined and compared. Satisfaction survey | s decreased their scores. Positive feedback: majority happy with program & teaching methods                                  | Level 2         | Not indicated                                                                |
| Muzyk        | 2017 | USA     | 51 psychiatry residents | After        | Classroom integrated into 4-year psychiatry program              | 4 year Program of neurobiology, psychopharmacology, and EBM in conjunction with a Research Domain Criteria (RDoC) perspective. Active learning                                    | Weekly and yearly attitude surveys                                    | Residents reported increased confidence, understanding and ability to communicate evidence to others after learning sessions | Level 3         | Participants mentioned increased ability to communicate evidence to patients |

## Supplemental Table 1 EBM Courses

| First Author | Year | Country | Cohort                                                                                                        | Design       | Setting & Duration                                    | Content & delivery                                                                                                                                                                                                                                                        | Outcome measures                                                                                                                   | Outcomes                                                                                                                                                                                      | Outcomes: NWKM* | Patient outcomes/involvement                                                                                   |
|--------------|------|---------|---------------------------------------------------------------------------------------------------------------|--------------|-------------------------------------------------------|---------------------------------------------------------------------------------------------------------------------------------------------------------------------------------------------------------------------------------------------------------------------------|------------------------------------------------------------------------------------------------------------------------------------|-----------------------------------------------------------------------------------------------------------------------------------------------------------------------------------------------|-----------------|----------------------------------------------------------------------------------------------------------------|
| Nandiwada    | 2017 | USA     | 15 cardiology residents and 4 fellows. Also other teams of approx. 90 residents on general medicine rotations | After        | EBM integrated with clinical care. Duration: 5 months | A multimodal pilot curriculum utilizing faculty and fellows as EBM coaches. Online module, an EBM template in e-health records, EBM presentations on rounds, and "coach" feedback on notes, principles of High Value Care (HVC) when communicating with specialist teams. | Post-curriculum survey (attitudes and self-reported behaviours) to assess curriculum activities. Small group debriefing sessions.  | HVC curriculum affected clinical decisions, increased communication of evidence, and was educationally valuable. Residents could understand the cost and value of subspecialty consultations. | Level 3         | Not indicated. SDM mentioned in reference to the consultant and resident, not resident/consultant and patient. |
| Nelson       | 2017 | USA     | 60 first & second year paediatric residents at 2 institutions                                                 | Before-after | Classroom sessions. Duration: One year                | Four 90-minute sessions using the methodology described in the book 'Studying a Study': MAARIE Framework. Activities included didactic sessions, and interactive                                                                                                          | Validated knowledge test (not named) administered 3 times: baseline, during course, after course. Each group took turn as control. | Post curriculum, the fall group's scores improved 23% from baseline (M=10.3, SD=2.4) to (M=12.7, SD=3.0) students (t(26)=-3.29, p=0.0018) while the spring group improved by 41%              | Level 2         | Not indicated                                                                                                  |

Supplemental Table 1 EBM Courses

| First Author | Year | Country | Cohort                                       | Design             | Setting & Duration                                     | Content & delivery                                                                                                                                                                         | Outcome measures                                                                         | Outcomes                                                                                                                                                       | Outcomes: NWKM* | Patient outcomes/involvement |
|--------------|------|---------|----------------------------------------------|--------------------|--------------------------------------------------------|--------------------------------------------------------------------------------------------------------------------------------------------------------------------------------------------|------------------------------------------------------------------------------------------|----------------------------------------------------------------------------------------------------------------------------------------------------------------|-----------------|------------------------------|
| Oller        | 2020 | USA     | 24 Residents in ambulatory clinic            | After              | Integrated with continuity clinic. Duration: 3 months. | Four Ambulatory Teaching Minute (ATM) exercises to deliver brief, case-based, faculty-facilitated teaching to residents. Didactic teaching with clinical application in ambulatory clinic. | Engagement survey modified from validated STROBE instrument.                             | (M=10.0, SD=2.8) to (M=14.1, SD=2.2) students (t(32)=-6.46, p<0.0001). When re-tested 4-6 months later, the fall the fall group's scores did not decline.      | Level 1         | Not indicated                |
| Pammi        | 2017 | USA     | 18 neonatal-perinatal subspecialty residents | Before-after study | Classroom: 7 one-hour meetings                         | Utilised concepts of self-direction, self-motivation, & individualized learning strategies into EBM course                                                                                 | Before EBM needs assessment survey & before-after neonatology-adapted Fresno test (NAFT) | Improvement in knowledge and skills: Mean test scores increased significantly (54 points, p < .001) in 14 learners after EBM course, indicating an increase in | Level 2         | Not indicated                |

## Supplemental Table 1 EBM Courses

| First Author | Year | Country | Cohort                                   | Design             | Setting & Duration                                                                | Content & delivery                                                                                                   | Outcome measures                                                                       | Outcomes                                                                                                                                                                                                     | Outcomes: NWKM* | Patient outcomes/involvement                           |
|--------------|------|---------|------------------------------------------|--------------------|-----------------------------------------------------------------------------------|----------------------------------------------------------------------------------------------------------------------|----------------------------------------------------------------------------------------|--------------------------------------------------------------------------------------------------------------------------------------------------------------------------------------------------------------|-----------------|--------------------------------------------------------|
| Ramaswamy    | 2020 | USA     | 17 Geriatric and palliative care fellows | Before-after       | Classroom and integrated. Duration: One year                                      | Didactic, self-directed and peer learning with feedback. Also EBM worksheets, EBM case conferences, journal clubs.   | Before-after surveys: Practice-Based Learning and Improvement (PBLI) competency rating | EBM-related knowledge and skills<br>Self-assessed confidence increased. Use of worksheets least popular but did help to modify patient care plans.                                                           | Level 3         | Authors assumed patient benefit from EBM intervention. |
| Tavarez      | 2020 | USA     | 22 paediatric emergency fellows          | Before-after study | Blended learning. EBM integrated into 2 years of a six-year fellowship programme. | Online modules, fellows lead face-to-face sessions, EBM worksheets for reinforcement. Emphasis on critical appraisal | In-Training Examination (ITE) scores to assess EBM knowledge and skills                | Scores were 21 percentage points higher during the EBM curriculum period. EBM curriculum was associated with significantly higher scores on the "Core Knowledge in Scholarly Activities" section of the ITE. | Level 2         | Not indicated                                          |

## Supplemental Table 1 EBM Courses

| First Author | Year | Country | Cohort | Design | Setting & Duration | Content & delivery | Outcome measures | Outcomes | Outcomes: NWKM* | Patient outcomes/involvement |
|--------------|------|---------|--------|--------|--------------------|--------------------|------------------|----------|-----------------|------------------------------|
|--------------|------|---------|--------|--------|--------------------|--------------------|------------------|----------|-----------------|------------------------------|

\*NWKM: New World Kirkpatrick Model
